# Supplementary material for: Platelet-camouflaged nanococktail: Simultaneous inhibition of drug-resistant tumor growth and metastasis via a cancer cells and tumor vasculature dual-targeting strategy
Source: PubMed Central journal article supplement — Theranostics. 2018 Apr 9;8(10):2683–95. doi: 10.7150/thno.23654 (PMC5957002; doi:10.7150/thno.23654), 2018-04-09
Supplement: thnov08p2683s1.pdf [file thnov08p2683s1.pdf]

## Supporting information

# Platelet-camouflaged nanococktail: Simultaneous inhibition of drug-resistant tumor growth and metastasis via a cancer cells and tumor vasculature dual-targeting strategy

*Lijia Jing<sup>1</sup>, Haijing Qu<sup>1</sup>, Dongqi Wu<sup>1</sup>, Chaojian Zhu<sup>1</sup>, Yongbo Yang<sup>2</sup>, Xing Jin<sup>1</sup>, Jian Zheng<sup>1</sup>, Xiangsheng Shi<sup>1</sup>, Xiufeng Yan<sup>1</sup> and Yang Wang<sup>1\*</sup>*

1. Center for Bioactive Products, Northeast Forestry University/Key Laboratory of Saline-Alkali Vegetation Ecology Restoration, Ministry of Education, Harbin 150040, China.
2. State Key Laboratory of Veterinary Biotechnology, Harbin Veterinary Research Institute, Chinese Academy of Agricultural Sciences, Harbin 150069, China.

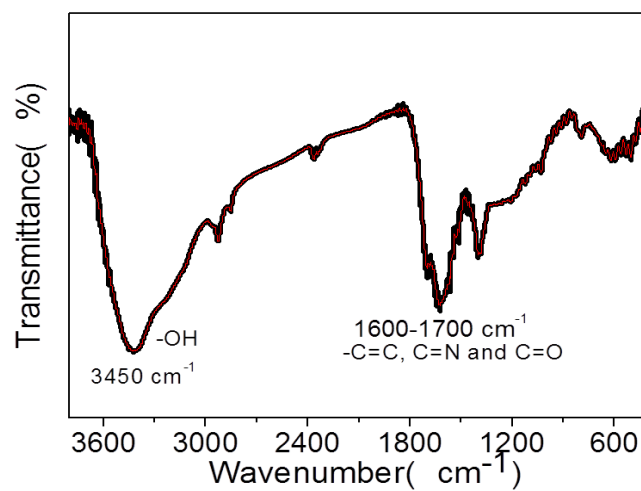

**Figure S1.** FTIR spectra of MNPs.

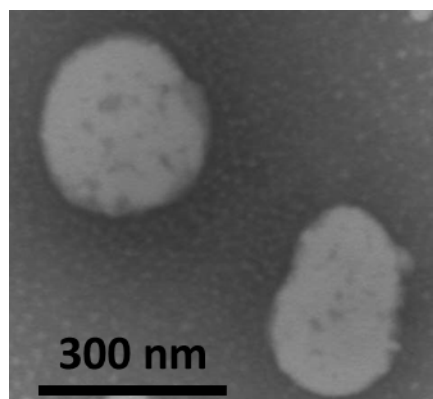

**Figure S2.** TEM image of platelet membrane (PM).

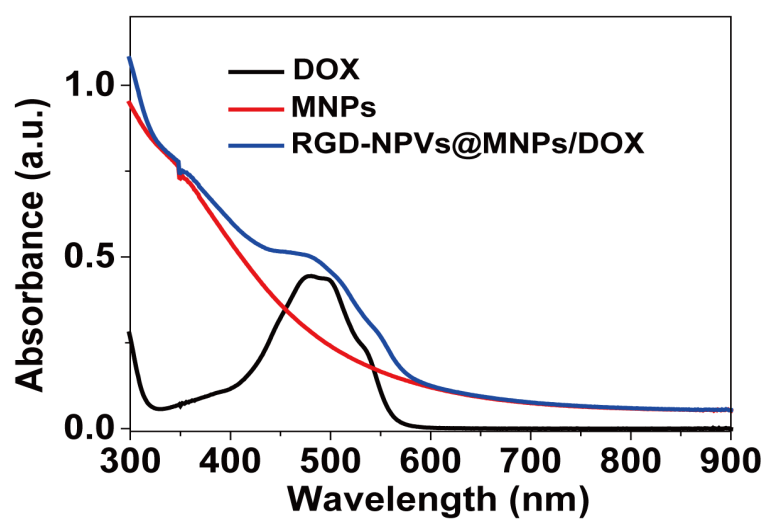

**Figure S3.** UV/vis absorption spectra of DOX, MNPs and RGD-NPVs@MNPs/DOX in aqueous solution.

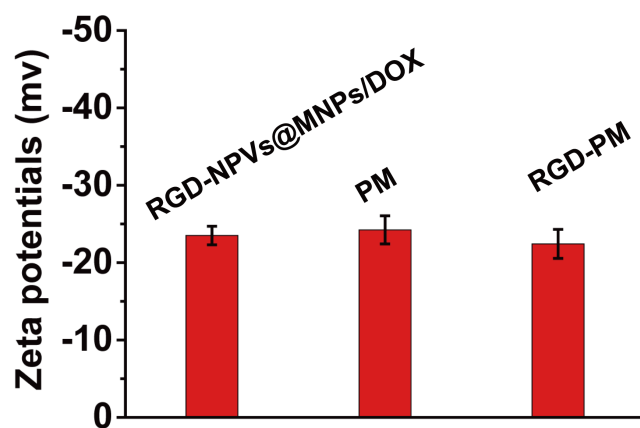

**Figure S4.** Zeta potentials of RGD-NPVs@MNPs/DOX, PM and RGD-PM.

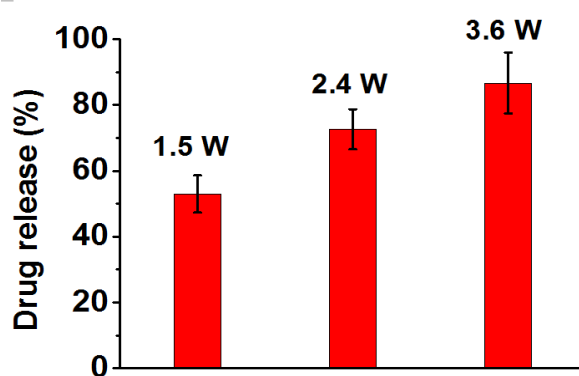

**Figure S5.** The DOX release rate from RGD-NPVs@MNPs/DOX at 8h after laser irradiation (808 nm, 10 min) at the power of 1.5, 2.4 and 3.6 W, respectively.

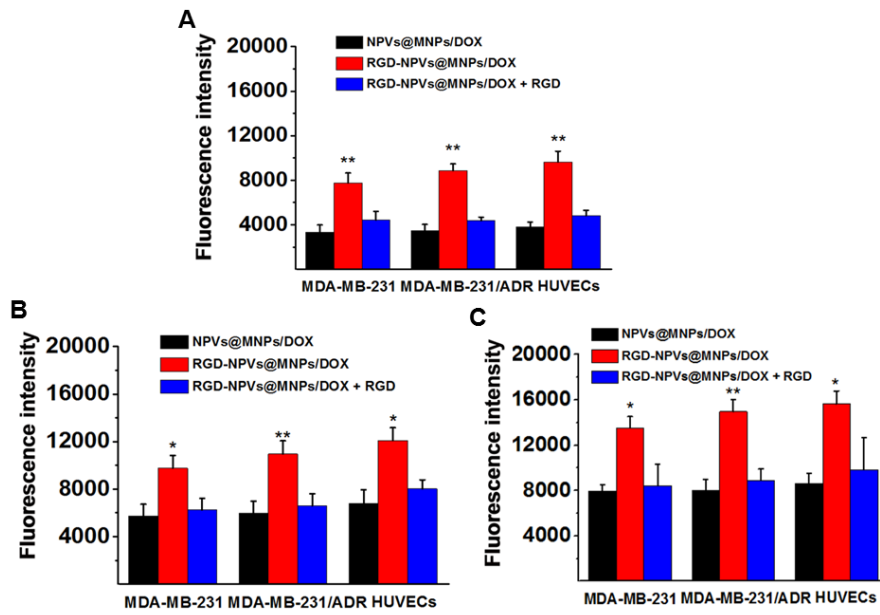

**Figure S6.** Fluorescence intensities of the tested cells after incubation with RhB labeled NPVs@MNPs/DOX and RGD-NPVs@MNPs/DOX with or without free RGD peptide for (A) 4 h, (B) 8 h and (C) 12 h. \*,  $P < 0.05$ ; \*\*,  $P < 0.01$ .

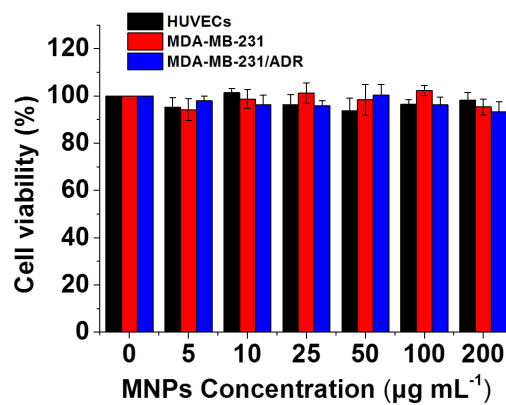

**Figure S7.** Viabilities of HUVECs, MDA-MB-231 and MDA-MB-231/ADR cells after incubation with different concentration of MNPs for 48 h.

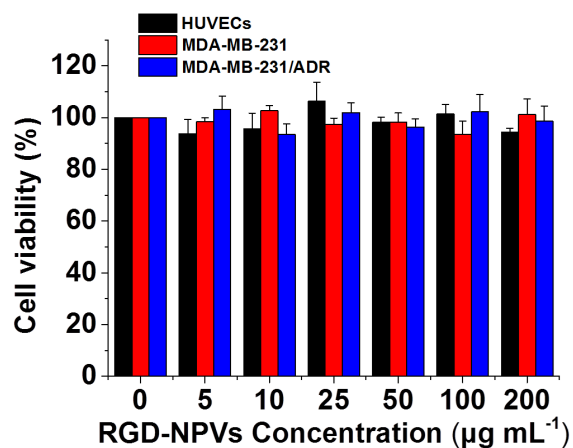

**Figure S8.** Viabilities of HUVECs, MDA-MB-231 and MDA-MB-231/ADR cells after incubation with different concentration of RGD-NPVs for 48 h.

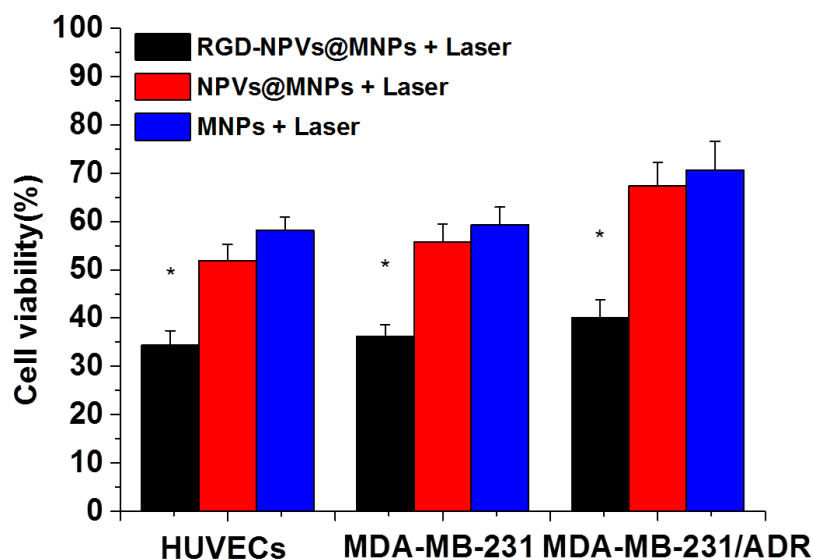

**Figure S9.** Viabilities of HUVECs, MDA-MB-231 and MDA-MB-231/ADR cells after treatment with RGD-NPVs@MNPs, NPVs@MNPs and MNPs at the same MNPs concentration (100 µg/mL) and the same NIR laser condition (1.5 W·cm<sup>-2</sup>, 10 min) for 24h. \*, P < 0.05.

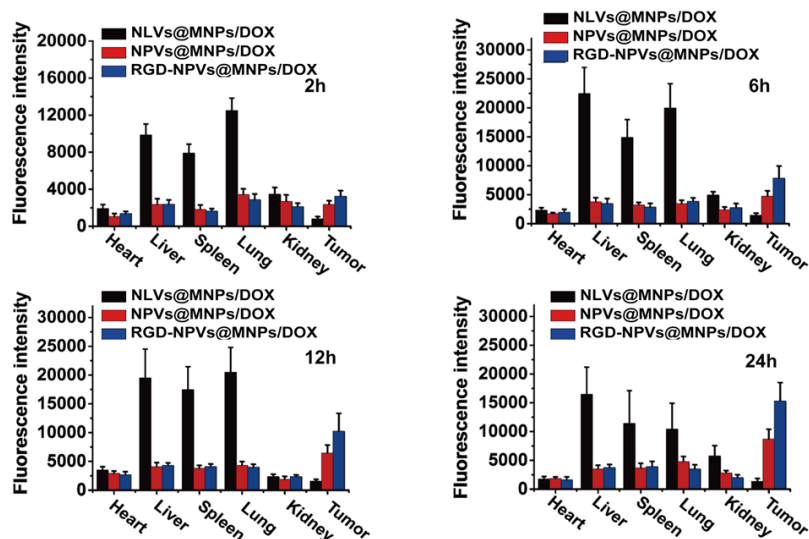

**Figure S10.** Fluorescence intensities of tumor and main organs in tumor bearing mice at 2, 6, 12, 24 h after the injection of RGD-NPVs@MNPs/DOX, NPVs@MNPs/DOX and NLVs@MNPs/DOX, respectively.

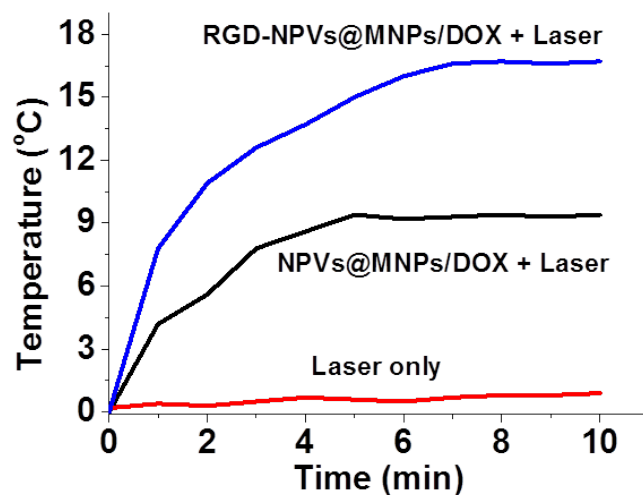

**Figure S11.** Temperature elevation curves of the mice tumor after treatments with NPVs@MNPs/DOX and RGD-NPVs@MNPs/DOX upon exposure to the 808 nm laser at a power density of  $1.5 \text{ W} \cdot \text{cm}^{-2}$  for 10 min.

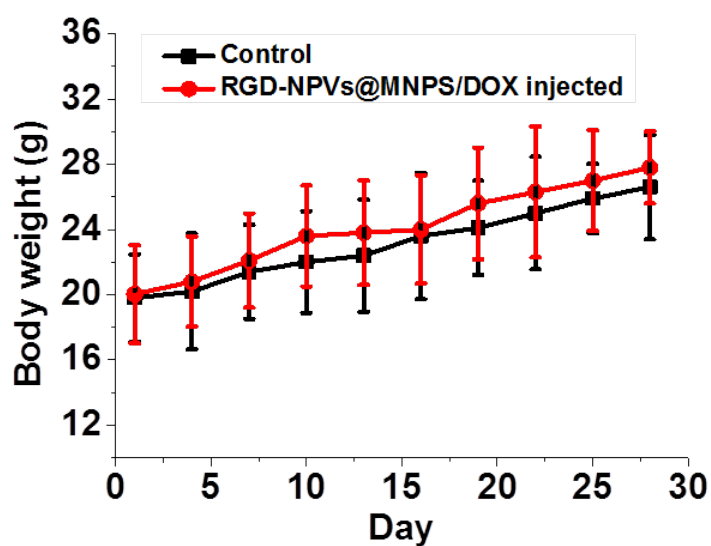

**Figure S12.** Body weight curves of the mice for 28 days with or without a single intravenous injection of RGD-NPVs@MNPs/DOX.

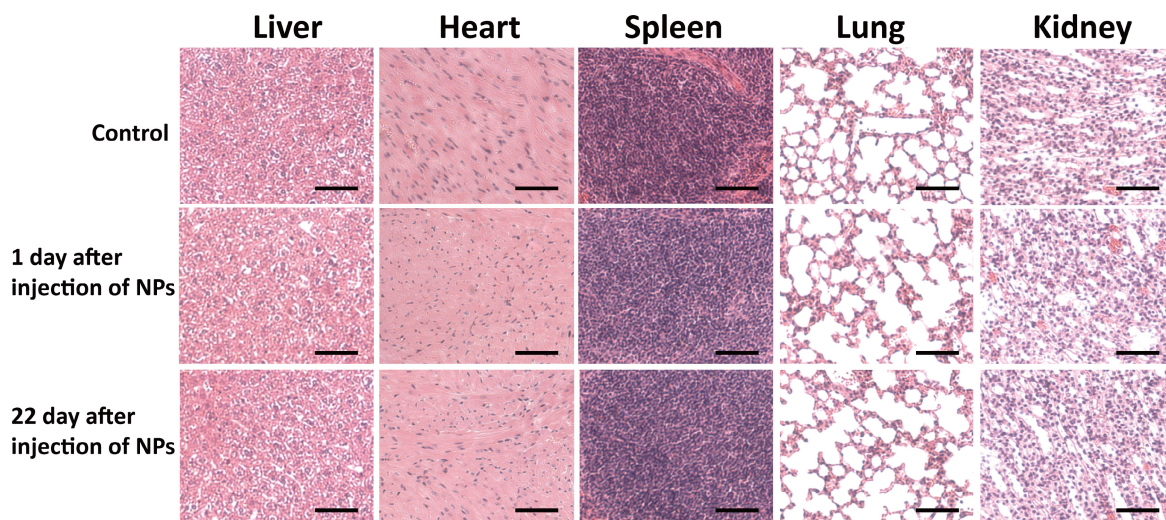

**Figure S13.** Histological examination for mice treated with RGD-NPVs@MNPs/DOX. Untreated healthy mice were used for comparison. Scale bar is 100  $\mu$ m.

**Table S1.** The size distributions of the nanoparticles

| Nanoparticles | Size distribution (nm) | Polymer dispersion index (PDI) |
|---------------|------------------------|--------------------------------|
|---------------|------------------------|--------------------------------|

|                                 |                |       |
|---------------------------------|----------------|-------|
| Melanin nanoparticles (MNPs)    | 3.8 ± 0.68     | 0.15  |
| Platelet membrane (PM) vesicles | 258.26 ± 77.81 | 0.38  |
| NLVs@MNPs/DOX                   | 80.52 ± 8.77   | 0.078 |
| NPVs@MNPs/DOX                   | 89.67 ± 9.66   | 0.089 |
| RGD-NPVs@MNPs/DOX               | 85.92 ± 6.28   | 0.064 |

**Table S2.** Viabilities of MDA-MB-231, MDA-MB-231/ADR and HUVECs after treating with RGD-NPVs@MNPs/DOX in combine with different laser irradiations.

| RGD-NPVs@MNPs/DOX (50µg/mL)       | Viability of MDA-MB-231cell (%) | Viability of MDA-MB-231/ADR cell (%) | Viability of HUVECs cell (%) |
|-----------------------------------|---------------------------------|--------------------------------------|------------------------------|
| (1.5 W·cm <sup>-2</sup> , 5 min)  | 47.34 ± 4.35                    | 75.34 ± 4.35                         | 55.34 ± 4.35                 |
| (1.5 W·cm <sup>-2</sup> , 10 min) | 15.63 ± 3.35                    | 29.4 ± 4.35                          | 23.5 ± 4.35                  |
| (2.4 W·cm <sup>-2</sup> , 5 min)  | 27.26 ± 7.89                    | 31.94 ± 8.23                         | 32.66 ± 5.32                 |
| (2.4 W·cm <sup>-2</sup> , 10 min) | 9.37 ± 0.94                     | 10.82 ± 1.08                         | 11.21 ± 0.84                 |

**Table S3.** Blood circulation parameters of NLVs@MNPs/DOX, NPVs@MNPs/DOX and RGD-NPVs@MNPs/DOX.

| Parameters                                                                           | RGD-NPVs@MNPs/DOX       | NPVs@MNPs/DOX           | NLVs@MNPs/DOX         |
|--------------------------------------------------------------------------------------|-------------------------|-------------------------|-----------------------|
| Blood half-life (T <sub>1/2</sub> )                                                  | 26.4 ± 3.2h             | 27.6 ± 4.1 h            | 5.13 ± 2.61 h         |
| Mean residence time (MRT)                                                            | 34.62 ± 5.71h           | 36.89 ± 7.46 h          | 7.79 ± 3.23 h         |
| The plasma concentration-time curve from zero to time infinity (AUC <sub>0-∞</sub> ) | 5983.37 ± 659.46 h·µg/L | 6398.42 ± 973.28 h·µg/L | 726.21 ± 298.4 h·µg/L |

**Table S4.** Blood biochemical indexes.

|                           | Untreated mice | RGD-NPVs@MNPs/DOX injected mice |              |
|---------------------------|----------------|---------------------------------|--------------|
|                           |                | 1 day                           | 22 day       |
| WBC (10 <sup>9</sup> /L)  | 13.35 ± 3.35   | 12.86 ± 4.1                     | 14.13 ± 2.61 |
| RBC (10 <sup>12</sup> /L) | 9.62 ± 1.17    | 8.98 ± 1.46                     | 9.04 ± 1.23  |
| PLT (10 <sup>12</sup> /L) | 0.87 ± 0.14    | 0.79 ± 0.097                    | 0.88 ± 0.12  |



|                           |               |               |                |
|---------------------------|---------------|---------------|----------------|
| GRN (10 <sup>9</sup> /L)  | 5.83 ± 0.97   | 6.24 ± 0.78   | 5.99 ± 1.02    |
| AST U L <sup>-1</sup>     | 486.0 ± 99.2  | 523.5 ± 126.6 | 498.7 ± 103.9  |
| ALT U L <sup>-1</sup>     | 86.34 ± 17.2  | 93.8 ± 10.8   | 86.7 ± 9.4     |
| ALP U L <sup>-1</sup>     | 187.64 ± 20.3 | 199.4 ± 25.1  | 178.32 ± 19.61 |
| CREA μmol L <sup>-1</sup> | 21.3 ± 1.2    | 20.9 ± 0.7    | 22.5 ± 1.3     |
| BUN mmol L <sup>-1</sup>  | 9.13 ± 0.8    | 10.2 ± 1.9    | 9.89 ± 0.9     |

---
